# Supplementary material
Source: publisher site journal article supplement (https://www.dovepress.com/article/503753)
Supplement: Supplementary file 1 [file get_supplementary_file.php]

**Supporting Information**


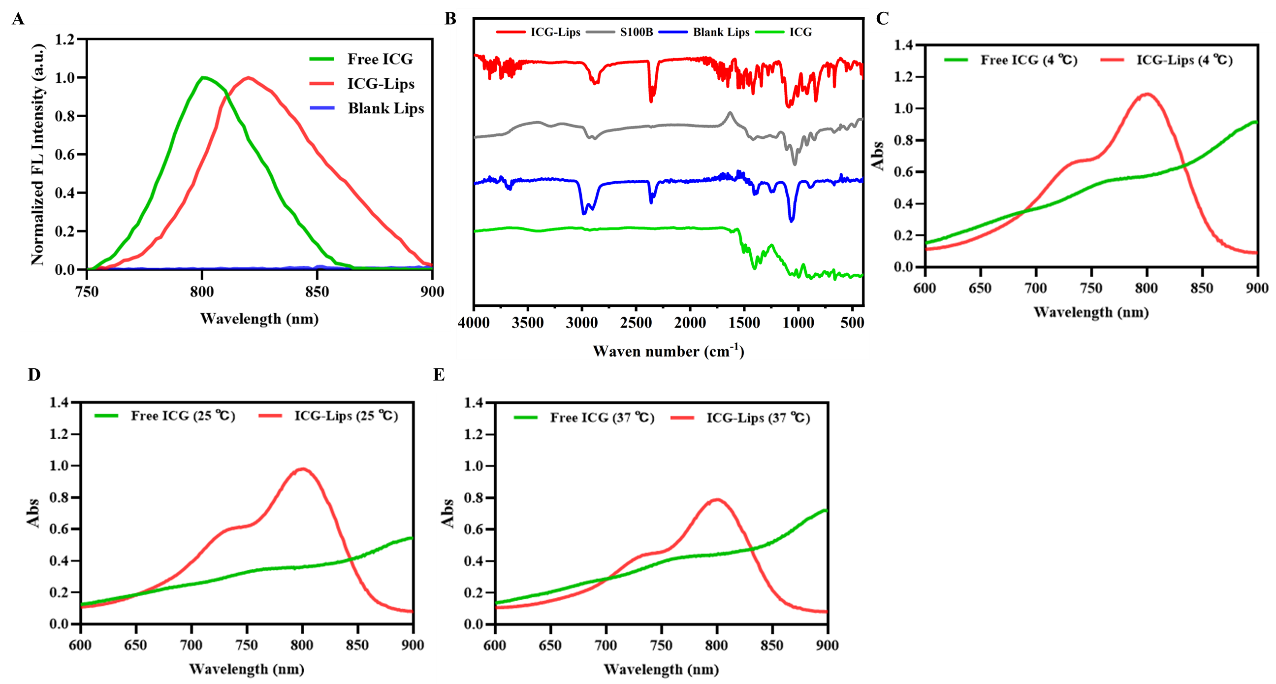


**Figure S 1.** (A) Fluorescence (FL) spectra of free ICG, blank liposomes, and ICG-Lips. (B) FTIR spectra of ICG, blank liposomes, streptavidin-conjugated S100B antibody, and ICG-Lips. (C-E) Stability determination of free ICG and ICG-Lips. (A-C) UV-Vis spectra of free ICG and ICG-Lips at day 13 at different storage temperatures.

**
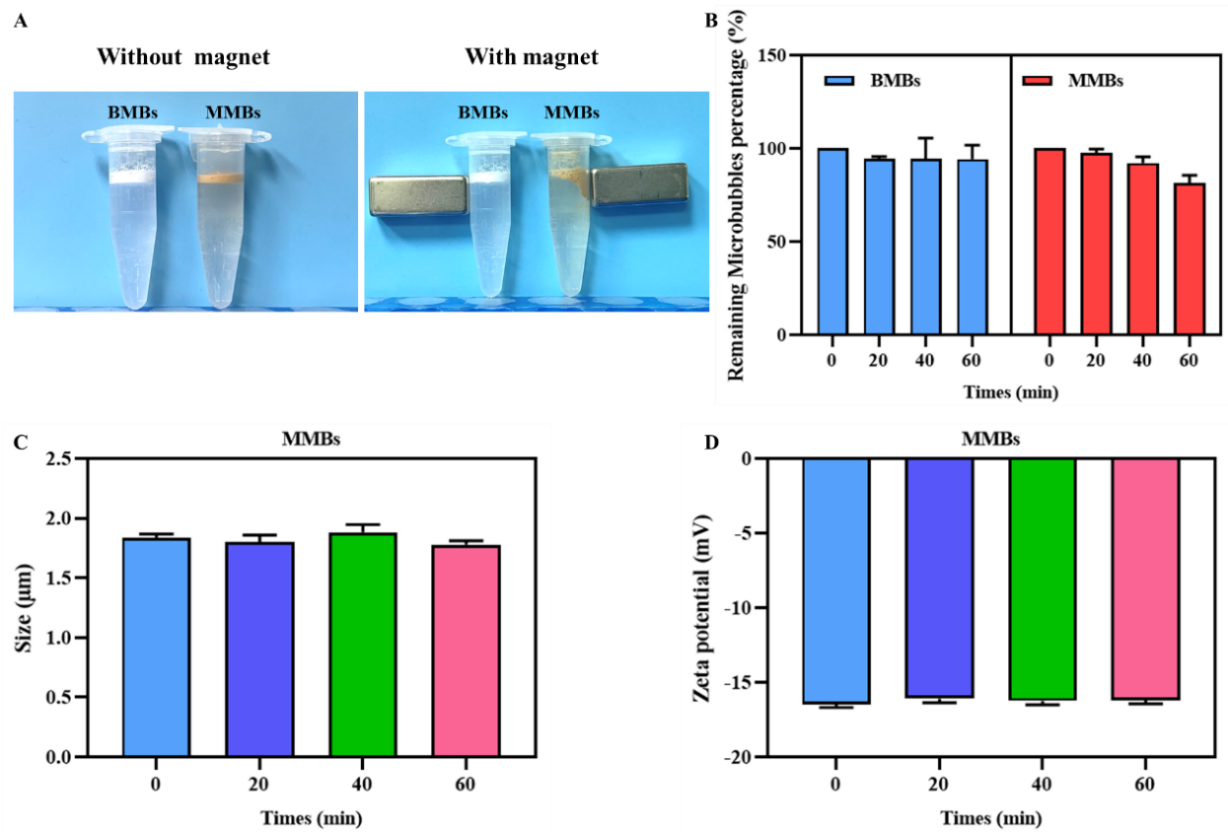
**

**Figure S 2.** (A) Optical images of the prepared biotinylated MBs and magnetic MBs in the absence and presence of a magnet. (B) The remaining percentage of MMBs with default timepoints. (C) The particle size distribution of MMBs changes at different timepoints. (D) The zeta potential of MMB at different timepoints.

**
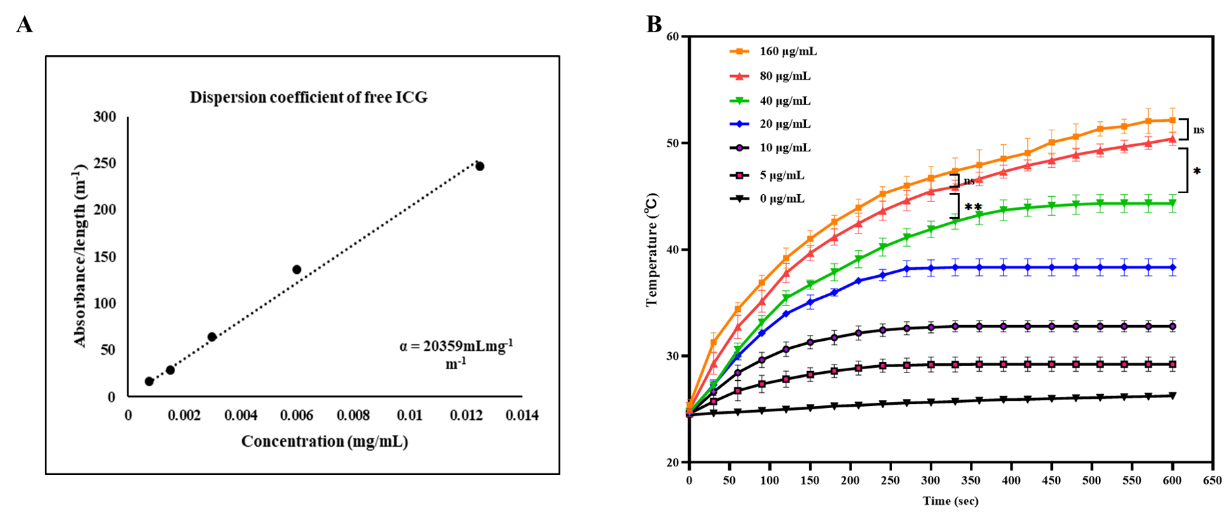
 Figure S 3.** (A) The dispersion coefficient of free ICG. (B) Temperature elevation of ICG-Lips at the different concentrations with NIR Laser irradiation (808 nm, 2.0 W/cm2, 10 min). ns: not significant (p > 0.05), *p<0.05, compared to the free ICG group.

**
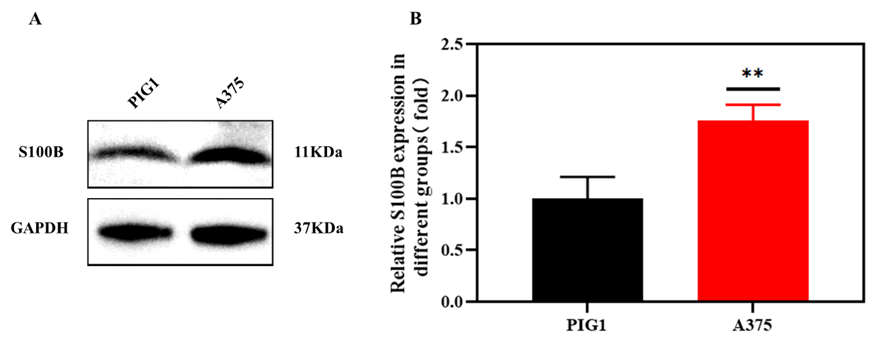
**

**Figure S 4.** (A)Western blotting analysis of S100B expression of PIG1 cells and A375 cells. (B) is the quantitative value of (A). **p<0.01, compared to the PIG1 group.

**
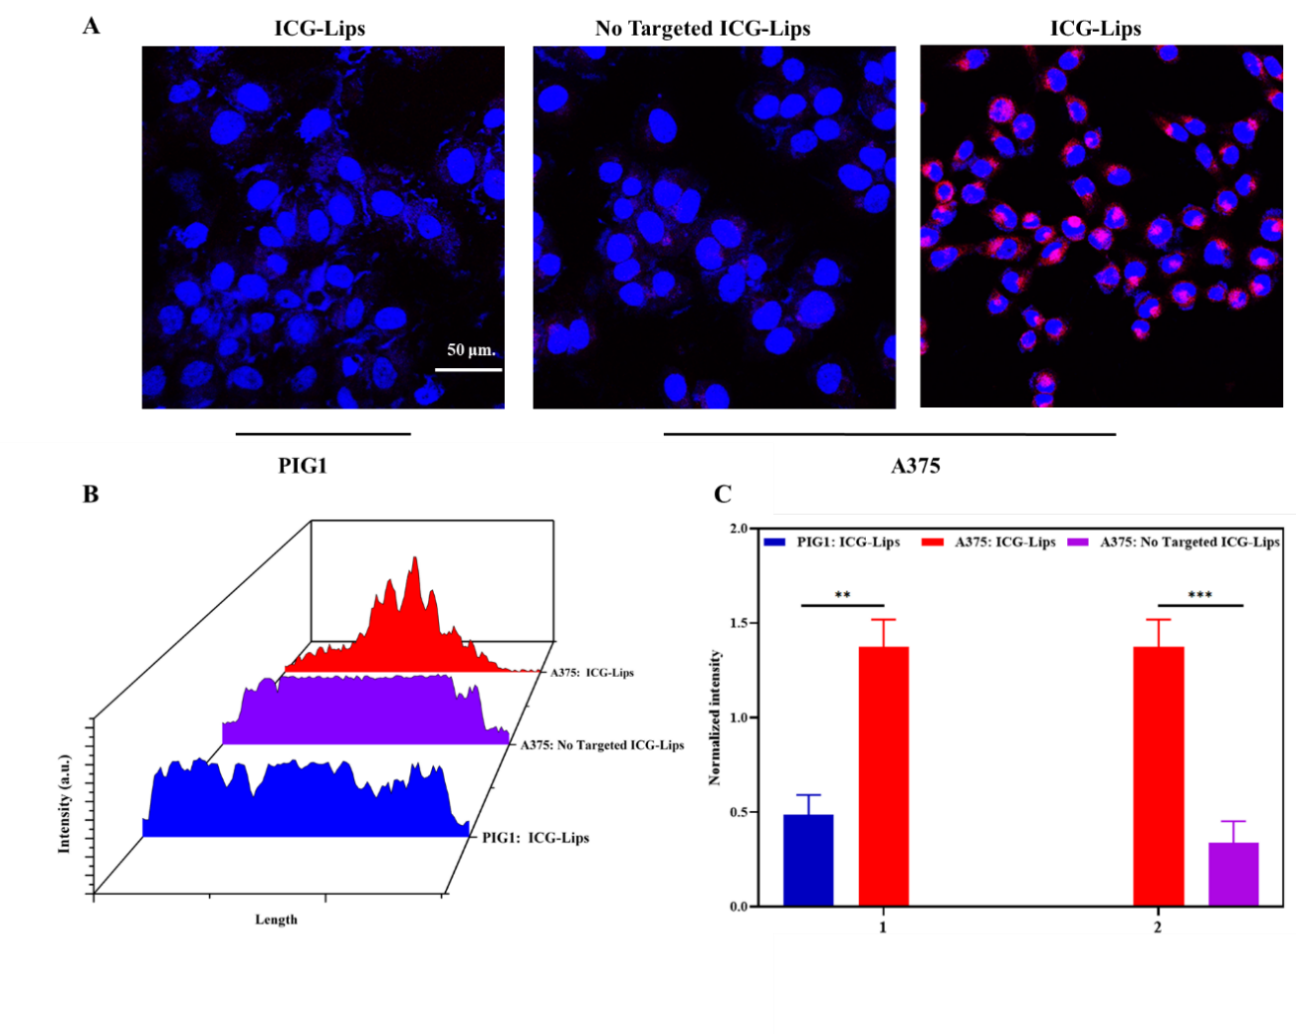
Figure S 5.** (A) Internalization of ICG-Lips and non-targeted ICG liposomes by A375 and internalization of ICG-Lips by PIG1 cells; (B) is a visualization of the different internalization scenarios in (A); and (C) Quantitative results of fluorescent intensity of internalized particles in (A). Targeted ICG-Liposomes: ICG-Lips; No Targeted ICG-Liposomes: No Targeted ICG-Lips. Scale bar: 50μm. **p<0.01,***p<0.001, compared to the ICG-Lips (PIG1) group/ No Targeted ICG-Lips (A375) group.

**
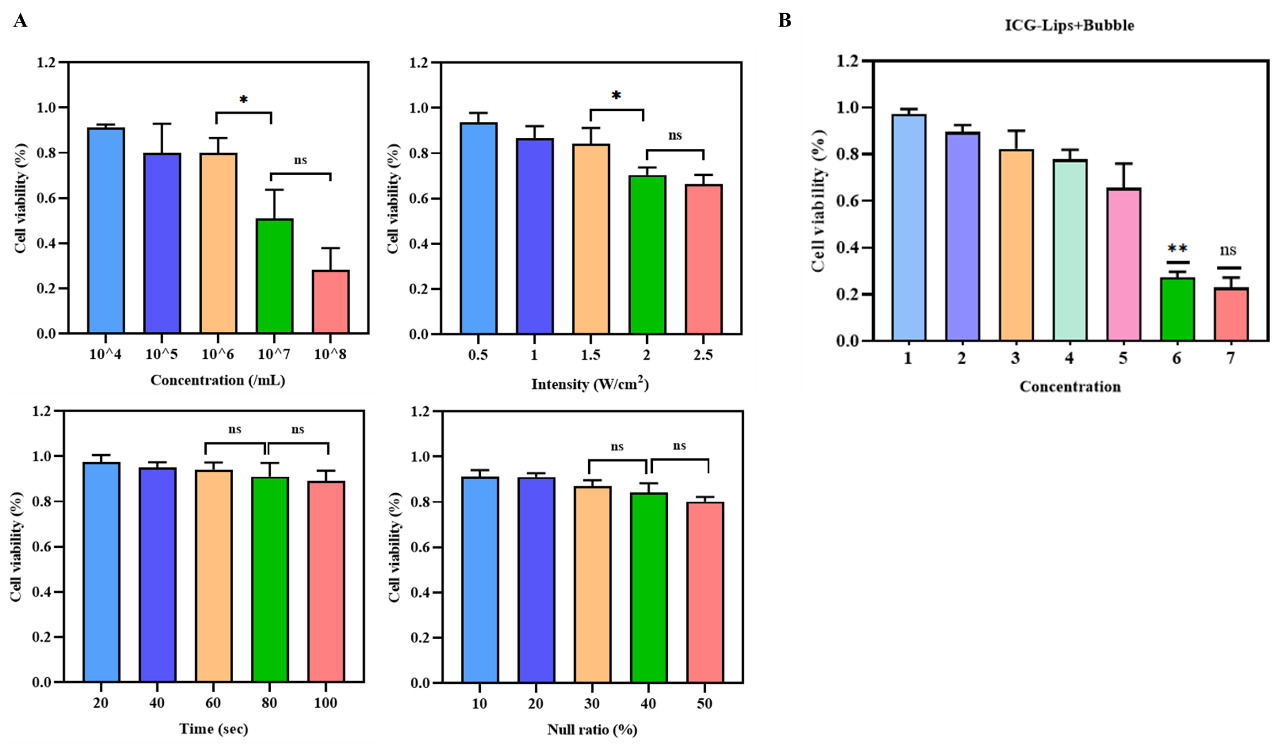
 Figure S 6.** (A) Cell viability of A375 cancer cells at different MMBs concentrations, different US interaction intensity, different time of US interaction and different duty cycles. (B) Cell viability of A375 cells co-incubated with MMBs and different concentrations of ICG-Lips and treated with US combination laser irradiation. (1: 2.5 μg/mL (ICG)+106/mL (Bubble); 2: 5 μg/mL (ICG)+106/mL (Bubble); 3: 10 μg/mL (ICG)+106/mL (Bubble); 4: 20 μg/mL (ICG)+106/mL (Bubble); 5: 40 μg/mL (ICG)+106/mL (Bubble); 6: 80 μg/mL (ICG)+106/mL (Bubble); 7: 160 μg/mL (ICG) +106/mL (Bubble). ns: not significant (p > 0.05), *p<0.05, **p<0.01, comparison between groups.

**
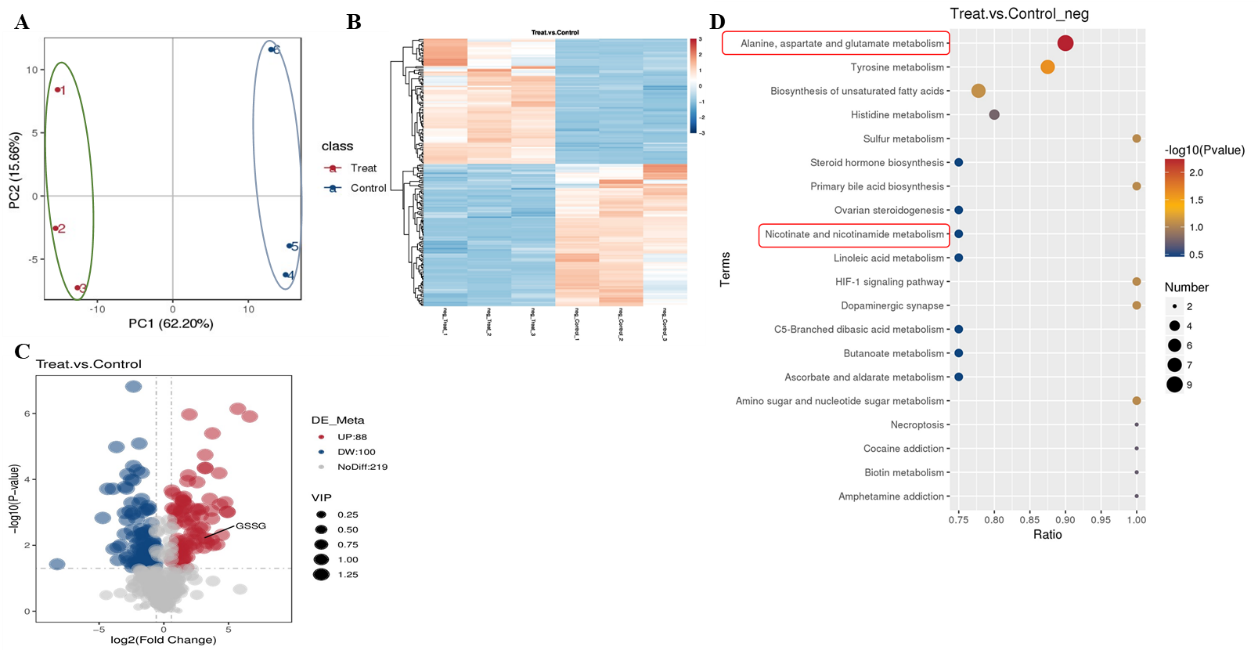
**

**Figure S 7.** (A) PCA score plot showing differences between the control and synergistic treatment group of A375 cells. (B) Heat map of metabolites in each treatment group. (C)Volcano plot demonstrating altered metabolite levels between the control and synergistic treatment groups. (D) Pathway analysis of significant differential metabolites between the control and synergistic treatment groups. Ion mode: negative.


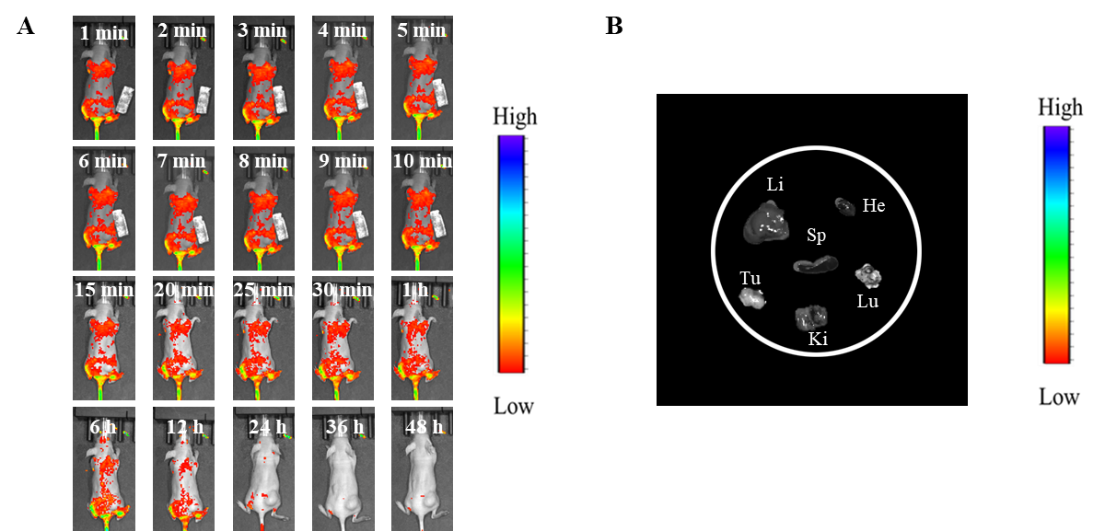


**Figure S 8.** (A) *In vivo* fluorescent images at default timepoints of A375-bearing tumor mice intravenously administered with DIR-labelled MMBs. (B) *Ex vivo* biodistribution imaging of MMBs 48 h after post-injection.

**
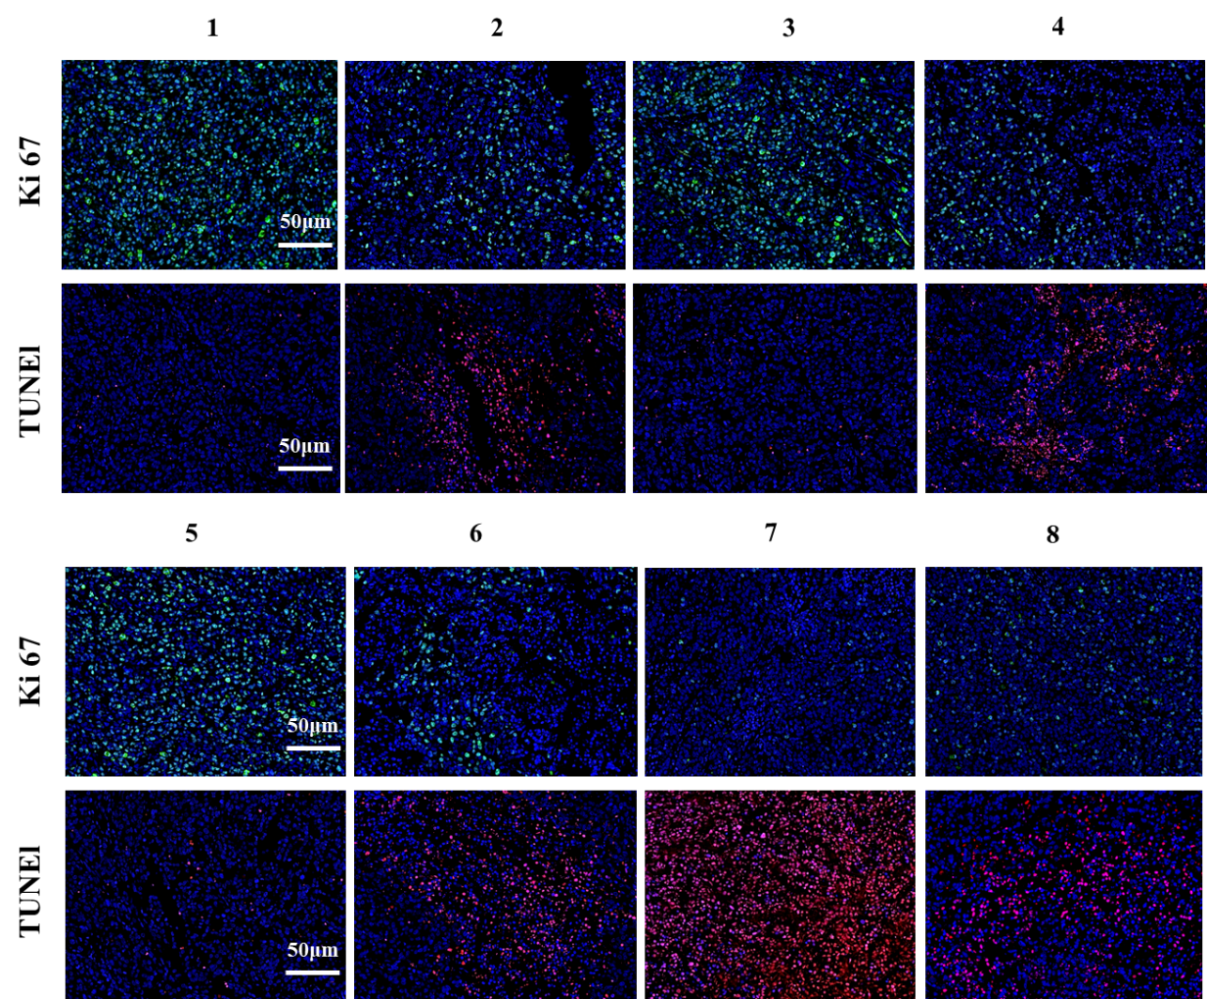
**

**Figure S 9.** Fluorescent staining of Ki 67 and TUNEL of the mice with different treatments. (n = 4, 1: PBS group (control); 2: free ICG + US + laser group; 3: MMBs + US + laser group; 4: ICG-Lips + US + laser group; 5: ICG-Lips + MMBs + US group; 6: ICG-Lips + MMBs + laser group; 7: ICG-Lips + MMBs + US + laser group (synergistic treatment group) and 8: ICG-Lips + MMBs + US + laser + Fer-1 group)


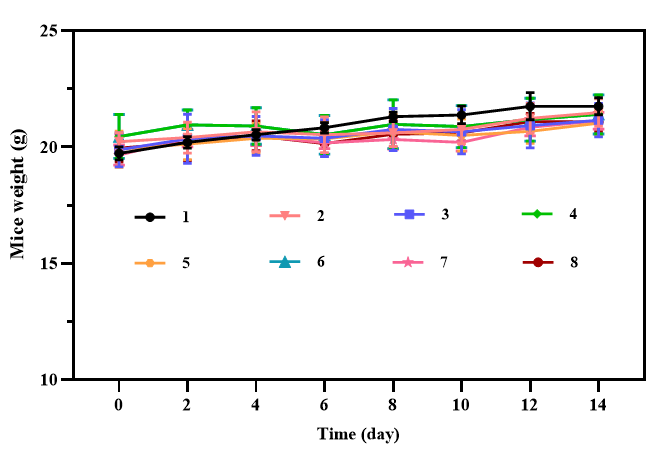


**Figure S 10.** Mean body weights of different groups of mice during therapy. Grouping is the same as Figure S 9.


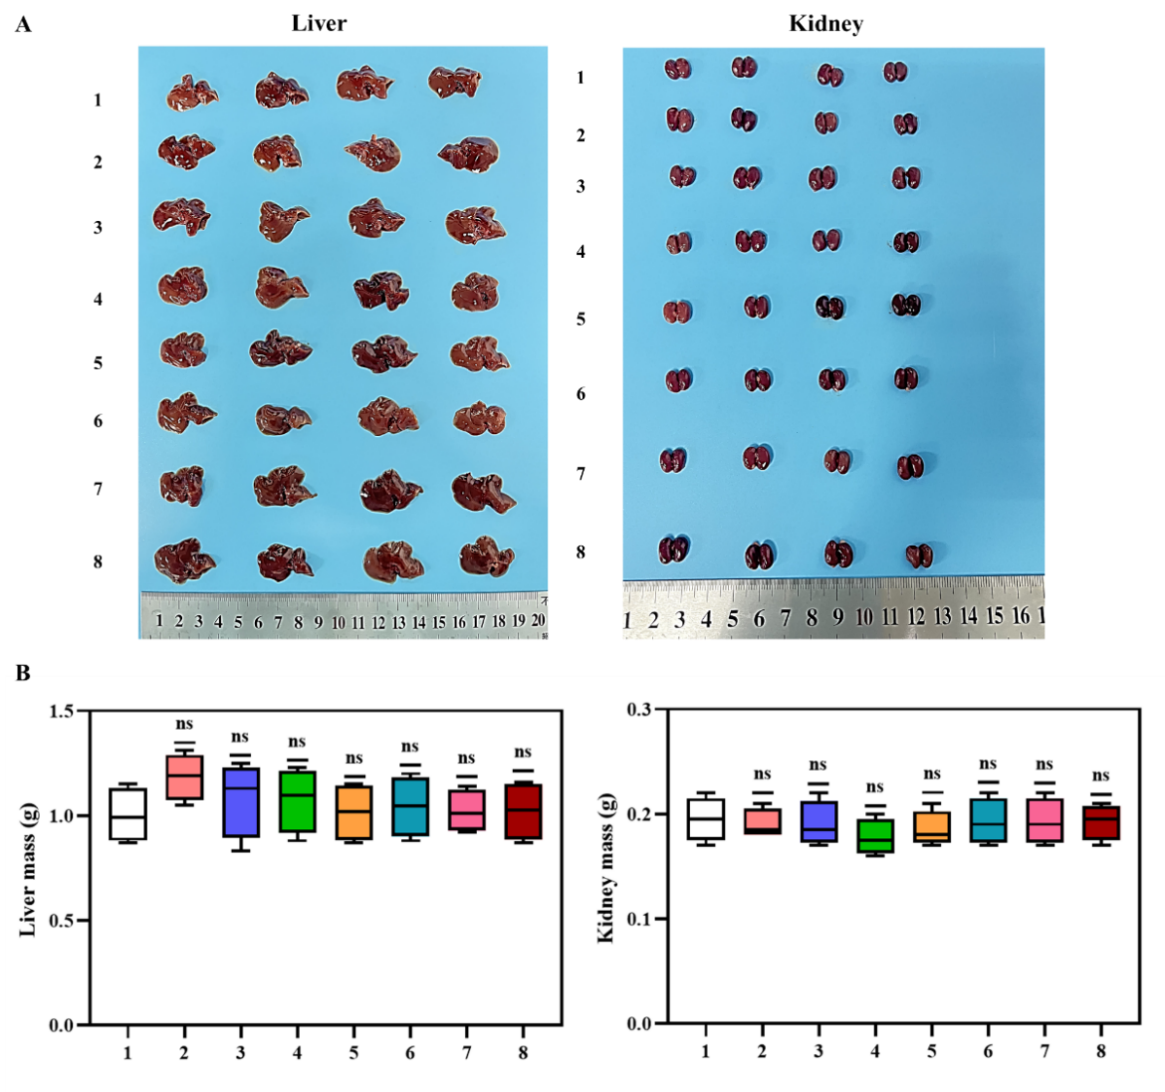


**Figure S 11.** (A) Captured liver and kidney of mice at the end of treatment from groups; (B) Mass weight of the liver and kidney. Grouping is the same as Figure S 9.


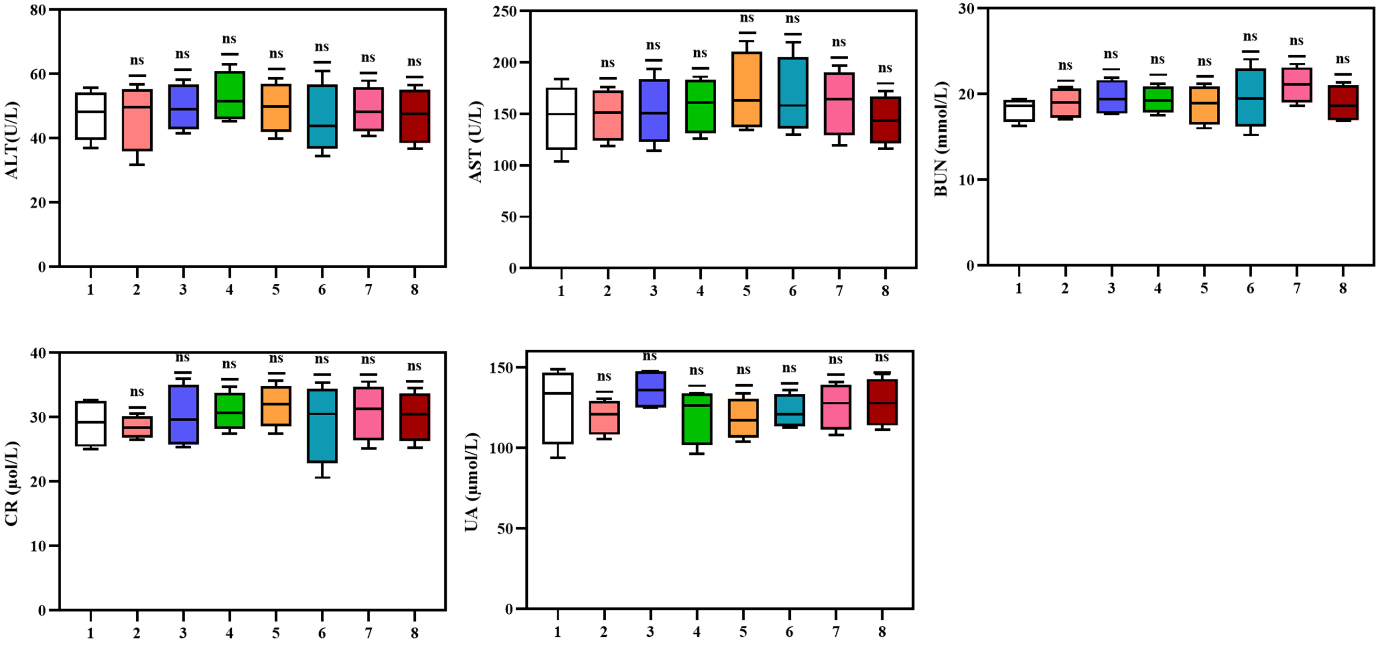


**Figure S 12.** Blood biochemical parameter measurements after different treatments. Grouping is the same as Figure S 9.

**
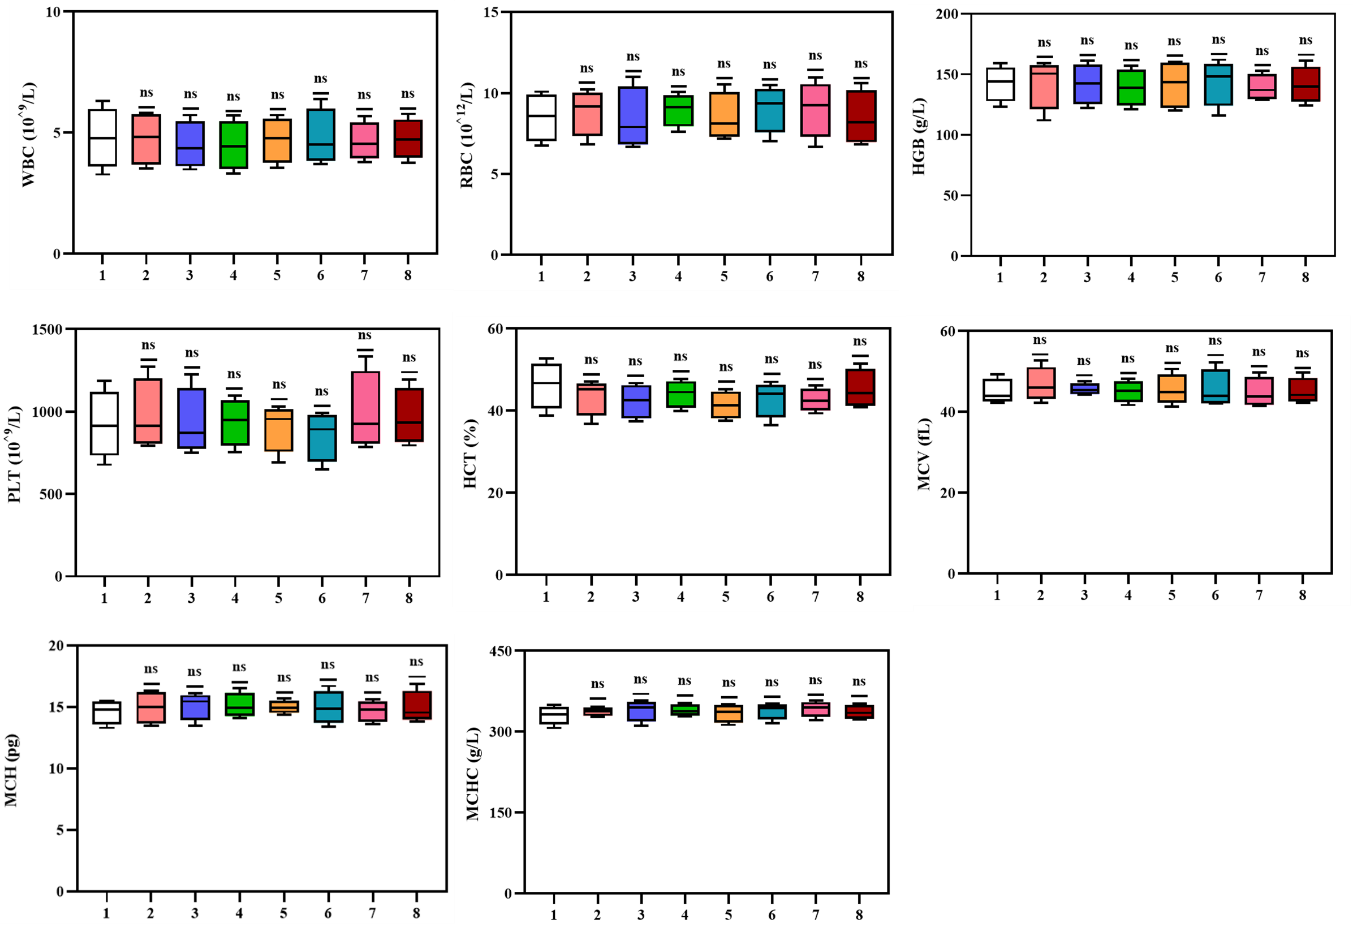
**

**Figure S 13.** Blood routine parameters analysis after different treatments. Grouping is the same as Figure S 9.


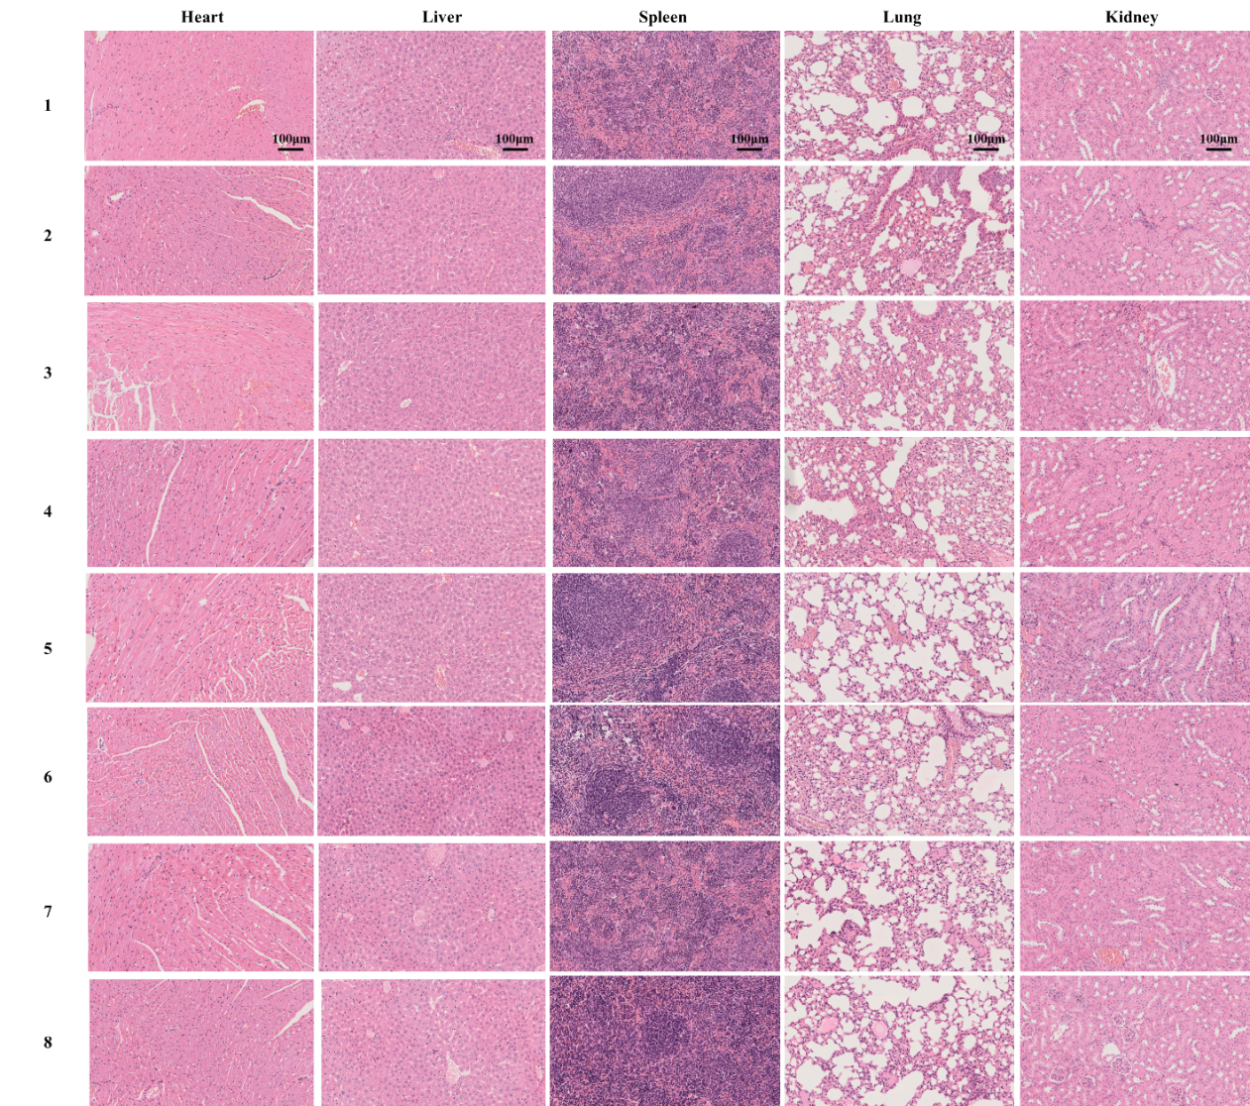


**Figure S 14.** H&E staining of the major organs at the end of the various treatments. Scale bar: 100 μm. Grouping is the same as Figure S 9.

**Table S 1.** The particle size, polydispersity index (PDI), and zeta potential of ICG-Lips and MMBs.

| **Samples** | **Size (nm)** | **PDI** | **Zeta potentials (mV)** |
| --- | --- | --- | --- |
| ICG-Lips | 180 ± 2.2 | 0.187 ± 0.10 | -22.2 ± 1.6 |
| MMBs | 1855.3 ± 0.9 | 0.16 ± 0.1 | -16.4 ± 0.2 |
| The data are presented as mean ± SD (n = 3) | | | |

**Table S 2.** Differential metabolites between control and ICG-Lips combined with MMBs groups in positive ion mode. (L-Glutathione oxidized (GSSG), an important indicator of ferroptosis, is highlighted in bold in the table).

| **Name** | **Formula** | **log2FC** | | **P-value** |
| --- | --- | --- | --- | --- |
| 3-{[(4fluorophenyl) sulfonyl] amino}-5-phenylthiophene-2-carboxamide | C17 H13 FN2 O3 S2 | -2.52 | 3.05E-05 | |
| S-(Methyl)Glutathione | C11 H19 N3 O6 S | 5.63 | 3.69E-05 | |
| 4-(1H-pyrazol-1-yl)-N, N-bis(2-pyridinylmethyl) benzenesulfonamide | C21 H19 N5 O2 S | 1.50 | 5.10E-05 | |
| 4-(2-phenyl-1H-indol-1-yl) butan-1-ol | C18 H19 N O | -6.24 | 5.34E-05 | |
| S-Adenosyl-L-methionine | C15 H22 N6 O5 S | 3.17 | 7.63E-05 | |
| KPK | C17 H33 N5 O4 | -3.27 | 0.000114 | |
| Hypotaurine | C2 H7 N O2 S | 3.01 | 0.000544 | |
| NAD+ | C21 H27 N7 O14 P2 | 0.95 | 0.000769 | |
| 2-Benzyl-5-[(3S)-1-isopropyl-3-pyrrolidinyl]-1,3,4-oxadiazole | C16 H21 N3 O | -0.92 | 0.000834 | |
| Triacanthine | C10 H13 N5 | 3.45 | 0.00087 | |
| (3-Methoxy-4-hydroxyphenyl) ethylene glycol sulfate | C9 H12 O7 S | -1.01 | 0.000977 | |
| PLK | C17 H32 N4 O4 | -4.57 | 0.000991 | |
| Acetyl-L-carnitine | C9 H17 N O4 | 2.30 | 0.001231 | |
| DL-Carnitine | C7 H15 N O3 | 1.66 | 0.001316 | |
| 5,6-dimethoxy-2-(2-methoxyphenyl)-4H-chromen-4-one | C18 H16 O5 | -3.87 | 0.001367 | |
| 2-[(3S)-1-(2-Methylbenzyl)-3-pyrrolidinyl]-1H-imidazo[4,5-b] pyridine | C18 H20 N4 | -1.71 | 0.00141 | |
| Hexanoylcarnitine | C13 H25 N O4 | 1.09 | 0.001485 | |
| Lysopa 18:0 | C21 H43 O7 P | 2.51 | 0.001529 | |
| Epigallocatechin | C15 H14 O7 | 2.80 | 0.001641 | |
| N8-Acetylspermidine | C9 H21 N3 O | 1.86 | 0.00169 | |
| L-beta-Imidazolelactic acid | C6 H8 N2 O3 | 1.14 | 0.001718 | |
| Creatine phosphate | C4 H10 N3 O5 P | 2.80 | 0.001788 | |
| Phosphocholine | C5 H14 N O4 P | 1.11 | 0.001851 | |
| ANK | C13 H25 N5 O5 | -2.79 | 0.001856 | |
| HNK | C16 H27 N7 O5 | -2.28 | 0.001873 | |
| S-Adenosylmethionine | C15 H22 N6 O5 S | 3.43 | 0.002007 | |
| N-[2-chloro-6-(trifluoromethoxy) phenyl]-2,2-dimethylpropanamide | C12 H13 Cl F3 N O2 | 2.14 | 0.002063 | |
| LPH | C17 H27 N5 O4 | -3.81 | 0.002346 | |
| 5,6-Dihydroxyindole-2-Carboxylic Acid | C9 H7 N O4 | 1.34 | 0.002384 | |
| L-Glutamic acid | C5 H9 N O4 | 1.29 | 0.002384 | |
| L-5-Hydroxytryptophan | C11 H12 N2 O3 | 1.95 | 0.002422 | |
| 7,8-Dihydroneopterin | C9 H13 N5 O4 | -2.81 | 0.002523 | |
| 1-(2-pyridin-2-yldiazenyl)-2-naphthol | C15 H11 N3 O | 3.21 | 0.002586 | |
| Nicotinic acid adenine dinucleotide | C21 H26 N6 O15 P2 | 2.78 | 0.002624 | |
| Homo-Gamma-Linolenic Acid (C20:3) | C20 H34 O2 | -2.24 | 0.002864 | |
| Picolinic acid N-oxide | C6 H5 N O3 | -1.27 | 0.002864 | |
| N3, N4-Dimethyl-L-arginine | C8 H18 N4 O2 | -1.68 | 0.003075 | |
| 13,14-dihydro Prostaglandin E1 | C20 H36 O5 | -1.55 | 0.003258 | |
| Gamma-Glu-Leu | C11 H20 N2 O5 | 4.21 | 0.003295 | |
| Adenosine 5'-diphosphoglucose | C16 H25 N5 O15 P2 | 1.95 | 0.003453 | |
| 4'-Methoxyflavone | C16 H12 O3 | 2.69 | 0.004548 | |
| Arachidonoyl ethanolamide phosphate | C22 H38 N O5 P | -3.65 | 0.004737 | |
| Coenzyme Q2 | C19 H26 O4 | -1.34 | 0.004885 | |
| UR-144 N-(5-Chloropentyl) analog | C21 H28 Cl N O | -2.90 | 0.005053 | |
| N1-Acetylspermine | C12 H28 N4 O | 1.54 | 0.005155 | |
| 18-HETE | C20 H32 O3 | -2.23 | 0.005298 | |
| N-Acetyl-L-histidine | C8 H11 N3 O3 | -1.29 | 0.005333 | |
| 3-amino-2-phenyl-2H-pyrazolo[4,3-c] pyridine-4,6-diol | C12 H10 N4 O2 | 0.85 | 0.005449 | |
| Spermine | C10 H26 N4 | 1.09 | 0.005643 | |
| 3-[1-(dimethylamino)-1H-pyrrol-2-yl]-2-(2-furylcarbonyl) acrylonitrile | C14 H13 N3 O2 | 3.78 | 0.005691 | |
| Thiazolidine-4-carboxylic acid | C4 H7 N O2 S | -0.74 | 0.005792 | |
| D-Fructose 1,6-bisphosphate | C6 H14 O12 P2 | 3.05 | 0.005854 | |
| 2-acetamido-3-(4-methoxyphenyl) propanoic acid | C12 H15 N O4 | 3.13 | 0.006086 | |
| 2-Amino-1,3-octadecanediol | C18 H39 N O2 | -2.69 | 0.006235 | |
| Andrographolide | C20 H30 O5 | -1.16 | 0.006288 | |
| Phosphoethanolamine | C2 H8 N O4 P | -1.33 | 0.007253 | |
| α-Linolenoyl ethanolamide | C20 H35 N O2 | -1.48 | 0.007519 | |
| Cytidine 5'-monophosphate (hydrate) | C9 H14 N3 O8 P | -1.43 | 0.007813 | |
| Cytidine 5'-Monophosphate-N-Acetylneuraminic Acid | C20 H31 N4 O16 P | 10.57 | 0.007816 | |
| Cyclic ADP-ribose | C15 H21 N5 O13 P2 | 0.93 | 0.008062 | |
| 2,3-dihydroxypropyl 12-methyltridecanoate | C17 H34 O4 | -1.20 | 0.008122 | |
| 2,5-Furandicarboxylic acid | C6 H4 O5 | 2.41 | 0.008449 | |
| Cocaethylene | C18 H23 N O4 | 0.95 | 0.008629 | |
| 17(S)-HETE | C20 H32 O3 | -1.33 | 0.009347 | |
| CAR 18:2 | C25 H46 N O4 | 2.32 | 0.009546 | |
| 3-Oxo-7alpha,12alpha-hydroxy-5beta-cholanoic acid | C24 H38 O5 | 2.42 | 0.00994 | |
| Adenosine 3'5'-cyclic monophosphate | C10 H12 N5 O6 P | 3.36 | 0.010217 | |
| Propionyl-L-carnitine | C10 H19 N O4 | 4.09 | 0.010669 | |
| APH | C14 H21 N5 O4 | -2.79 | 0.011763 | |
| octadec-9-ynoic acid | C18 H32 O2 | -2.38 | 0.012393 | |
| DL-Lysine | C6 H14 N2 O2 | -0.69 | 0.012772 | |
| Pipecolic acid | C6 H11 N O2 | -0.69 | 0.012772 | |
| D-Raffinose | C18 H32 O16 | -3.13 | 0.012978 | |
| Cyclocytidine | C9 H11 N3 O4 | 1.38 | 0.013004 | |
| 4-(4-methylbenzyl)-1lambda~6~,4-thiazinane-1,1-dione | C12 H17 N O2 S | 2.02 | 0.013255 | |
| N-Acetyl-aspartic acid | C6 H9 N O5 | 1.27 | 0.013418 | |
| **L-Glutathione oxidized** | **C20 H32 N6 O12 S2** | **2.63** | **0.01392** | |
| Guanine | C5 H5 N5 O | -1.21 | 0.014043 | |
| Corey Lactone Diol | C8 H12 O4 | 0.59 | 0.014184 | |
| SPB 16:1;2O | C16 H33 N O2 | -1.53 | 0.014586 | |
| 2,6-Dihydroxypurine | C5 H4 N4 O2 | -0.85 | 0.014644 | |
| 2,4-dihydroxyheptadec-16-en-1-yl acetate | C19 H36 O4 | -2.40 | 0.015618 | |
| Dl-3-Hydroxynorvaline | C5 H11 N O3 | 0.79 | 0.016141 | |
| 4-(3-Methyl-5-oxo-4,5-dihydro-1H-pyrazol-1-yl) benzoic acid | C11 H10 N2 O3 | 2.34 | 0.016275 | |
| Guanosine monophosphate | C10 H14 N5 O8 P | -2.49 | 0.016389 | |
| Stearamide | C18 H37 N O | -1.54 | 0.016667 | |
| L-Ergothioneine | C9 H15 N3 O2 S | 4.11 | 0.01783 | |
| Benzoylecgonine | C16 H19 N O4 | -1.89 | 0.01804 | |
| GKK | C14 H29 N5 O4 | -3.60 | 0.018128 | |
| CAR 20:4 | C27 H46 N O4 | 2.31 | 0.018215 | |
| Penicillin G | C16 H18 N2 O4 S | -1.45 | 0.01944 | |
| Gly-Phe | C11 H14 N2 O3 | -2.88 | 0.020664 | |
| D-Sphingosine | C18 H37 N O2 | -1.96 | 0.020691 | |
| L-Tyrosinemethylester | C10 H13 N O3 | 0.59 | 0.020843 | |
| 5'-S-Methyl-5'-thioadenosine | C11 H15 N5 O3 S | 3.64 | 0.020865 | |
| N-[(4-hydroxy-3-methoxyphenyl) methyl]-8-methylnonanamide | C18 H29 N O3 | -1.87 | 0.020901 | |
| Nicotinic acid | C6 H5 N O2 | -2.93 | 0.022099 | |
| ANH | C13 H20 N6 O5 | -2.11 | 0.022221 | |
| DL-Arginine | C6 H14 N4 O2 | -0.70 | 0.02244 | |
| LPC 18:2-SN1 | C26 H50 N O7 P | -1.54 | 0.022788 | |
| 3-(5-phenyl-1,3-oxazol-2-yl)-4-(trifluoromethyl)pyridine | C15 H9 F3 N2 O | -1.87 | 0.023384 | |
| CAR 18:0 | C25 H50 N O4 | -1.46 | 0.023524 | |
| SPB 22:1;2O | C22 H45 N O2 | 1.63 | 0.024761 | |
| Cystathionine | C7 H14 N2 O4 S | 2.45 | 0.025998 | |
| 2-[5-(2-hydroxypropyl) oxolan-2-yl] propanoic acid | C10 H18 O4 | 1.17 | 0.026128 | |
| 5-Methyl-2'-deoxycytidine | C10 H15 N3 O4 | 2.71 | 0.026215 | |
| D- (-)-Glutamine | C5 H10 N2 O3 | -0.73 | 0.027531 | |
| Homotaurine | C3 H9 N O3 S | -1.43 | 0.028108 | |
| 3-methyl-5-oxo-5-(4-toluidino) pentanoic acid | C13 H17 N O3 | 1.52 | 0.029528 | |
| Leucylproline | C11 H20 N2 O3 | -1.48 | 0.029758 | |
| ELK | C17 H32 N4 O6 | -1.16 | 0.030207 | |
| Thiamine | C12 H16 N4 O S | -0.62 | 0.030211 | |
| PC 19:0_20:5 | C47 H84 N O8 P | -1.17 | 0.030368 | |
| 1,2-dihydroxyheptadec-16-yn-4-yl acetate | C19 H34 O4 | -2.95 | 0.030517 | |
| Royal jelly acid | C10 H18 O3 | 1.91 | 0.030938 | |
| (3S,9aS)-3-benzyl-octahydro-1H-pyrido[1,2-a] pyrazin-1-one | C15 H20 N2 O | -0.88 | 0.030941 | |
| L-Aspartic acid | C4 H7 N O4 | 1.24 | 0.031618 | |
| (5-L-Glutamyl)-L-Amino Acid | C8 H14 N2 O5 | -1.34 | 0.033721 | |
| Solvent blue 4 | C33 H33 N3 O | 2.90 | 0.034278 | |
| PC 19:2_19:2 | C46 H84 N O8 P | -2.24 | 0.034365 | |
| Gly-Tyr | C11 H14 N2 O4 | -2.16 | 0.035495 | |
| Pyridoxamine | C8 H12 N2 O2 | -1.01 | 0.035594 | |
| R-1 Methanandamide phosphate | C23 H40 N O5 P | -2.93 | 0.035911 | |
| LPC 16:1-SN1 | C24 H48 N O7 P | -1.28 | 0.038753 | |
| PC O-20:4 | C28 H50 N O7 P | -0.95 | 0.038848 | |
| Nicotinamide | C6 H6 N2 O | 1.66 | 0.039791 | |
| JNJ-1661010 | C19 H19 N5 O S | 0.79 | 0.040205 | |
| 2'-fluoro-N, N-diisopropyl[1,1'-biphenyl]-4-carboxamide | C19 H22 F N O | -1.36 | 0.041357 | |
| 7-(2-hydroxypropan-2-yl)-1,4a-dimethyl-decahydronaphthalen-1-ol | C15 H28 O2 | -1.29 | 0.042861 | |
| 2-chloro-6-{4-[1-(methylsulfonyl)-1H-pyrazol-5-yl] phenoxy} benzonitrile | C17 H12 Cl N3 O3 S | -2.79 | 0.04371 | |
| D-Panthenol | C9 H19 N O4 | 2.78 | 0.043943 | |
| PC 19:2_18:3 | C45 H80 N O8 P | -2.41 | 0.044575 | |
| PC (16:0/16:0) | C40 H80 N O8 P | 1.81 | 0.046036 | |
| Proline-hydroxyproline | C10 H16 N2 O4 | -1.75 | 0.046731 | |
| Tyramine | C8 H11 N O | -1.53 | 0.047571 | |
| PC O-36:3 | C44 H84 N O7 P | -2.75 | 0.048372 | |
| 1-morpholino-3-(4-nitrophenoxy) propan-2-ol | C13 H18 N2 O5 | -1.58 | 0.049372 | |
| Methandrostenolone | C20 H28 O2 | -1.46 | 0.04982 | |
| Pantetheine | C11 H22 N2 O4 S | 1.99 | 0.049848 | |

**Table S 3.** Differential metabolites between control and ICG-Lips combined with MMBs groups in negative ion mode. (Glutathione disulfide (GSSG), an important indicator of ferroptosis, is highlighted in bold in the table.)

| **Name** | **Formula** | **log2FC** | **Pvalue** |
| --- | --- | --- | --- |
| δ-Ribono-1,4-lactone | C5 H8 O5 | -2.34 | 1.52E-07 |
| 2-({[4-(6-methyl-1,3-benzothiazol-2-yl) phenyl] imino} methyl) phenol | C21 H16 N2 O S | 5.71 | 7.20E-07 |
| Pyrrole-2-carboxylic acid | C5 H5 N O2 | 1.98 | 1.07E-06 |
| 3-[3-(beta-D-Glucopyranosyloxy)-2-hydroxyphenyl] propanoic acid | C15 H20 O9 | 6.64 | 1.23E-06 |
| 1a,1b-Dihomo prostaglandin E1 | C22 H38 O5 | 3.76 | 4.01E-06 |
| 2-Isopropylmalic acid | C7 H12 O5 | -1.90 | 8.15E-06 |
| 4-Amino-5-imidazolecarboxamide | C4 H6 N4 O | -3.66 | 1.04E-05 |
| N-Oleoyl Glycine | C20 H37 N O3 | 3.19 | 1.81E-05 |
| N-Lauroylsarcosine | C15 H29 N O3 | -2.35 | 3.94E-05 |
| 6α-Prostaglandin I1 | C20 H34 O5 | 3.20 | 4.48E-05 |
| 5α-Dihydrotestosterone | C19 H30 O2 | 3.19 | 4.51E-05 |
| N-(4-chlorophenethyl)-N'-(4-chlorophenyl) urea | C15 H14 Cl2 N2 O | -2.07 | 5.26E-05 |
| JWH 250 N-pentanoic acid metabolite | C22 H23 N O4 | -1.72 | 6.25E-05 |
| 5-Methyltetrahydrofolic acid | C20 H25 N7 O6 | 4.27 | 6.45E-05 |
| Cholic acid | C24 H40 O5 | -2.80 | 6.98E-05 |
| 4-Hydroxy-L-Glutamic Acid | C5 H9 N O5 | 1.89 | 7.55E-05 |
| Deoxycholic acid | C24 H40 O4 | -2.53 | 0.000102 |
| (R)-3-Hydroxy myristic acid | C14 H28 O3 | -2.37 | 0.000106 |
| 3,4-Dihydroxyphenylpropionic acid | C9 H10 O4 | 1.83 | 0.000112 |
| Leu-Pro | C11 H20 N2 O3 | 2.58 | 0.000121 |
| 13(S)-HOTrE | C18 H30 O3 | -2.99 | 0.000169 |
| Glycoursodeoxycholic acid | C26 H43 N O5 | -2.88 | 0.000189 |
| LPE 17:1 | C22 H44 N O7 P | -3.92 | 0.000192 |
| Glu-Val-Phe | C19 H27 N3 O6 | -4.35 | 0.000194 |
| N-Acetylalanine | C5 H9 N O3 | 0.62 | 0.000218 |
| H-Gly-Pro-OH | C7 H12 N2 O3 | 0.71 | 0.000264 |
| N-Carbamyl-L-glutamicacid | C6 H10 N2 O5 | 1.56 | 0.000339 |
| L-Dopa | C9 H11 N O4 | 1.25 | 0.000357 |
| 1-[(1R,2S,3R,5R)-5-Cyclohexyl-2,3-dihydroxycyclopentyl]-3-ethylurea | C14 H26 N2 O3 | 3.55 | 0.00039 |
| Nonanoic acid | C9 H18 O2 | -1.71 | 0.000395 |
| N-Acetyl-D-tryptophan | C13 H14 N2 O3 | 1.48 | 0.000433 |
| Boc-beta-cyano-L-alanine | C9 H14 N2 O4 | 1.49 | 0.000448 |
| Nicotinamide adenine dinucleotide | C21 H27 N7 O14 P2 | 1.52 | 0.000475 |
| Adenylosuccinic acid | C14 H18 N5 O11 P | 4.74 | 0.000494 |
| Glycocholic acid | C26 H43 N O6 | -2.49 | 0.000513 |
| LPE 16:1 | C21 H42 N O7 P | -1.87 | 0.000523 |
| trans-Aconitic acid | C6 H6 O6 | 4.34 | 0.000581 |
| Levodopa | C9 H11 N O4 | 1.76 | 0.000588 |
| acetyl phospahte | C2 H5 O5 P | -1.22 | 0.000645 |
| N-Acetyl-1-aspartylglutamic acid | C11 H16 N2 O8 | 0.68 | 0.000748 |
| Oxaceprol | C7 H11 N O4 | 1.59 | 0.000766 |
| Phosphocreatine | C4 H10 N3 O5 P | 2.89 | 0.000786 |
| Phenylacetylglycine | C10 H11 N O3 | -1.15 | 0.000789 |
| 2-Furoic acid | C5 H4 O3 | 2.48 | 0.000791 |
| N-Acetyl-Asp-Glu | C11 H16 N2 O8 | 0.88 | 0.000797 |
| N,5-Bis(3-(trifluoromethyl) phenyl) oxazol-2-amine | C17 H10 F6 N2 O | -1.38 | 0.00081 |
| Cys-Gly | C5 H10 N2 O3 S | -1.28 | 0.000842 |
| 3-[(methoxycarbonyl)amino]-2,2,3-trimethylbutanoic acid | C9 H17 N O4 | 2.62 | 0.000845 |
| N-Acetylneuraminic acid | C11 H19 N O9 | 1.33 | 0.000872 |
| N-lactoyl-phenylalanine | C12 H15 N O4 | 3.68 | 0.000885 |
| N-Acetylaspartic acid | C6 H9 N O5 | 0.83 | 0.000886 |
| Guanosine monophosphate (GMP) | C10 H14 N5 O8 P | -2.63 | 0.000921 |
| Piceatannol | C14 H12 O4 | 4.90 | 0.000957 |
| Adenylocuccinic Acid | C14 H18 N5 O11 P | 4.92 | 0.000976 |
| 5-Methoxypsoralen | C12 H8 O4 | -1.64 | 0.000979 |
| o-Toluic Acid | C8 H8 O2 | 1.33 | 0.00099 |
| Uric acid | C5 H4 N4 O3 | -3.01 | 0.001045 |
| Feruloyl Putrescine | C14 H20 N2 O3 | -2.38 | 0.001067 |
| Eicosapentaenoic acid | C20 H30 O2 | -2.43 | 0.001142 |
| cis-Aconitic acid | C6 H6 O6 | 2.84 | 0.001254 |
| Uridine diphosphate galactose | C15 H24 N2 O17 P2 | 2.20 | 0.001295 |
| Nicotinamide adenine dinucleotide phosphate | C21 H28 N7 O17 P3 | 1.44 | 0.001335 |
| Biotin | C10 H16 N2 O3 S | -4.72 | 0.001477 |
| Isorhapontigenin | C15 H14 O4 | 0.92 | 0.001485 |
| alpha-Ketoglutaric acid | C5 H6 O5 | 3.71 | 0.001543 |
| Arachidonic acid | C20 H32 O2 | -2.11 | 0.001566 |
| Ureidosuccinic acid | C5 H8 N2 O5 | -2.85 | 0.001699 |
| Taurine | C2 H7 N O3 S | 2.17 | 0.001757 |
| Citric acid | C6 H8 O7 | 1.66 | 0.001898 |
| ethyl 3-[(1-benzyl-4-piperidyl) amino]-2-cyanoacrylate | C18 H23 N3 O2 | -0.96 | 0.002129 |
| Lipoic acid | C8 H14 O2 S2 | 0.86 | 0.002246 |
| 2-Hydroxy-4-methylthiobutanoic acid | C5 H10 O3 S | 1.87 | 0.002309 |
| N'1-(3,4,5-trimethoxybenzylidene)-3-(4-hydroxyphenyl) propanohydrazide | C19 H22 N2 O5 | 3.00 | 0.00285 |
| dAMP | C10 H14 N5 O6 P | 2.78 | 0.002904 |
| Acetylenedicarboxylic acid | C4 H2 O4 | -1.75 | 0.003237 |
| 3-Methylindole | C9 H9 N | -1.07 | 0.003361 |
| Adenosine 3-phosphate 5-phosphosulfate | C10 H15 N5 O13 P2 S | -2.46 | 0.003485 |
| Desthiobiotin | C10 H18 N2 O3 | -1.29 | 0.003694 |
| N-Acetylsphingosine | C20 H39 N O3 | 2.39 | 0.003702 |
| Lauric Acid | C12 H24 O2 | -1.56 | 0.004138 |
| D-Gluconic acid | C6 H12 O7 | 2.16 | 0.004251 |
| LPE 16:0 | C21 H44 N O7 P | -1.68 | 0.004278 |
| Tenofovir | C9 H14 N5 O4 P | 2.64 | 0.004409 |
| 15(S)-HpETE | C20 H32 O4 | -1.59 | 0.004426 |
| Glycolithocholic acid | C26 H43 N O4 | -3.02 | 0.004507 |
| SDMA | C8 H18 N4 O2 | -1.77 | 0.004512 |
| 10-Nitrolinoleate | C18 H31 N O4 | 4.48 | 0.004805 |
| trans-10-Heptadecenoic Acid | C17 H32 O2 | -2.31 | 0.005445 |
| Mevalonic acid | C6 H12 O4 | -1.49 | 0.005788 |
| **glutathione disulfide** | **C20 H32 N6 O12 S2** | **3.05** | **0.006144** |
| Linoleic Acid | C18 H32 O2 | 3.25 | 0.006149 |
| Asp-glu | C9 H14 N2 O7 | 1.05 | 0.006381 |
| Adrenic acid | C22 H36 O2 | -1.87 | 0.006531 |
| 3-Methoxytyramine | C9 H13 N O2 | 3.70 | 0.006664 |
| 5-Hydroxytryptophan | C11 H12 N2 O3 | 1.75 | 0.006741 |
| Ofloxacin impurity E | C17 H18 F N3 O4 | 2.36 | 0.006923 |
| Docosapentaenoic acid | C22 H34 O2 | -1.61 | 0.007268 |
| aminoimidazole carboxamide ribonucleotide | C9 H15 N4 O8 P | -0.79 | 0.007369 |
| Fumaric acid | C4 H4 O4 | 1.24 | 0.007506 |
| Traumatic acid | C12 H20 O4 | -0.85 | 0.007545 |
| UDP-N-acetylglucosamine | C17 H27 N3 O17 P2 | 3.34 | 0.008371 |
| Dodecanedioic acid | C12 H22 O4 | -1.51 | 0.008479 |
| 5 methyl THF | C20 H25 N7 O6 | -2.09 | 0.008801 |
| Glu-Glu | C10 H16 N2 O7 | 1.68 | 0.008844 |
| 13,14-dihydro-19(R)-hydroxy Prostaglandin E1 | C20 H36 O6 | 0.97 | 0.008872 |
| (+/-)10(11)-EpDPA | C22 H32 O3 | 2.31 | 0.008917 |
| (±)9(10)-DiHOME | C18 H34 O4 | -0.92 | 0.008997 |
| 8(S)-Hydroxy-(5Z,9E,11Z,14Z)-eicosatetraenoic acid | C20 H32 O3 | -1.14 | 0.009118 |
| PB-22 N-pentanoic acid-3-carboxyindole metabolite | C14 H15 N O4 | 4.13 | 0.009388 |
| Folic acid | C19 H19 N7 O6 | -3.34 | 0.009809 |
| 2-(3,4-dimethoxyphenyl) ethanamine | C10 H15 N O2 | 3.83 | 0.009931 |
| 7-Hydroxy-4-chromone | C9 H6 O3 | -0.83 | 0.009941 |
| Succinic acid | C4 H6 O4 | 1.39 | 0.010448 |
| α-D-Glucose-1,6-bisphosphate | C6 H14 O12 P2 | 1.97 | 0.010491 |
| (+/-)19(20)-DiHDPA | C22 H34 O4 | -1.09 | 0.010831 |
| 8-Hydroxyguanosine | C10 H13 N5 O6 | -0.67 | 0.011144 |
| Ascorbic acid | C6 H8 O6 | -3.56 | 0.011304 |
| Acetylcarnitine | C9 H17 N O4 | 3.10 | 0.011805 |
| 16-Hydroxyhexadecanoic acid | C16 H32 O3 | -1.53 | 0.012237 |
| D-Ribose | C5 H10 O5 | 2.46 | 0.012242 |
| 2-Aminobenzenesulfonic acid | C6 H7 N O3 S | -1.97 | 0.012322 |
| Guanosine 5'-diphospho-??-L-fucose | C16 H25 N5 O15 P2 | 1.37 | 0.012867 |
| 5-(tert-butyl)-2-methyl-N-(5-methyl-3-isoxazolyl)-3-furamide | C14 H18 N2 O3 | -3.88 | 0.012888 |
| D-2-Aminoadipic acid | C6 H11 N O4 | 1.21 | 0.013464 |
| Adenosine triphosphate (ATP) | C10 H16 N5 O13 P3 | 1.37 | 0.013536 |
| Orotidine | C10 H12 N2 O8 | 1.64 | 0.013694 |
| 12-Hydroxydodecanoic acid | C12 H24 O3 | -2.20 | 0.013939 |
| L-Ascorbate | C6 H8 O6 | -1.81 | 0.014299 |
| Glycerol 3-phosphate | C3 H9 O6 P | -0.90 | 0.014672 |
| Methylmalonic acid | C4 H6 O4 | 1.13 | 0.015072 |
| Pregnenolone | C21 H32 O2 | -1.52 | 0.016209 |
| N4-Acetylcytidine | C11 H15 N3 O6 | 1.22 | 0.016394 |
| LPE 18:2 | C23 H44 N O7 P | -1.49 | 0.016666 |
| Asaraldehyde | C10 H12 O4 | -1.02 | 0.017297 |
| 2-Phenylpropionic acid | C9 H10 O2 | -1.02 | 0.017297 |
| 11-Ketoetiocholanolone | C19 H28 O3 | 1.46 | 0.017434 |
| 4-Methyl-2-Oxopentanoic Acid | C6 H10 O3 | -1.79 | 0.018149 |
| 3-Indoleacrylic acid | C11 H9 N O2 | 0.72 | 0.018187 |
| 2-Methylbutyroylcarnitine | C12 H23 N O4 | -1.51 | 0.018575 |
| 5-Phosphoribosyl 1-pyrophosphate | C5 H13 O14 P3 | 1.28 | 0.018586 |
| AICA ribonucleotide | C9 H15 N4 O8 P | -0.84 | 0.018771 |
| CDP | C9 H15 N3 O11 P2 | -2.84 | 0.020147 |
| 2-Hydroxycaproic acid | C6 H12 O3 | -1.11 | 0.020332 |
| N1-{3-[2-(2-pyridyl) ethyl] phenyl}-4-chlorobenzene-1-sulfonamide | C19 H17 Cl N2 O2 S | -1.73 | 0.020767 |
| Delta-Tridecalactone | C13 H24 O2 | 0.73 | 0.020908 |
| 1a,1b-Dihomo prostaglandin F2α | C22 H38 O5 | 1.81 | 0.022774 |
| LPE 19:1 | C24 H48 N O7 P | -2.88 | 0.023682 |
| N6-Succinyl Adenosine | C14 H17 N5 O8 | 1.63 | 0.023787 |
| Cytidine-5'-monophosphate | C9 H14 N3 O8 P | 0.84 | 0.024272 |
| Docosatrienoic Acid | C22 H38 O2 | -1.30 | 0.025186 |
| Isobutyryl carnitine | C11 H21 N O4 | -1.69 | 0.025445 |
| Sedoheptulose 1,7-bisphosphate | C7 H16 O13 P2 | 1.53 | 0.025636 |
| 8Z,11Z,14Z-Eicosatrienoic acid | C20 H34 O2 | -1.77 | 0.025806 |
| beta-Nicotinamide adenine dinucleotide phosphate | C21 H28 N7 O17 P3 | 0.63 | 0.026132 |
| LPE 22:5 | C27 H46 N O7 P | -1.10 | 0.026376 |
| Androsterone glucuronide | C25 H38 O8 | 1.44 | 0.027263 |
| LPI 20:4 | C29 H49 O12 P | -1.17 | 0.027617 |
| Uridine | C9 H12 N2 O6 | -2.17 | 0.02806 |
| Docosahexaenoic acid | C22 H32 O2 | -1.11 | 0.028137 |
| Taurolithocholic acid 3-sulfate | C26 H45 N O8 S2 | -3.55 | 0.028181 |
| LPC 20:4 | C28 H50 N O7 P | -1.10 | 0.030116 |
| Oleoyl-L-alpha-lysophosphatidic acid | C21 H40 Na O7 P | -2.76 | 0.030345 |
| 2-Phenylglycine | C8 H9 N O2 | -1.99 | 0.030568 |
| 7,8-Dihydrofolate | C19 H21 N7 O6 | 0.62 | 0.030961 |
| Metanephrine | C10 H15 N O3 | -1.37 | 0.031253 |
| 12-epi Leukotriene B4 | C20 H32 O4 | -1.01 | 0.032154 |
| Xanthine | C5 H4 N4 O2 | -1.24 | 0.032698 |
| 19(R)-hydroxy Prostaglandin E2 | C20 H32 O6 | -2.05 | 0.03272 |
| LPC 22:4 | C30 H54 N O7 P | -2.28 | 0.033614 |
| LPE 18:1 | C23 H46 N O7 P | -0.65 | 0.034926 |
| Ala-Gln | C8 H15 N3 O4 | -2.53 | 0.035639 |
| N-acetyl-D-glucosamine | C8 H15 N O6 | 1.40 | 0.036148 |
| Uridine 5'-diphosphate (UDP) | C9 H14 N2 O12 P2 | -2.02 | 0.036413 |
| PE 18:0_18:1 | C41 H80 N O8 P | -8.24 | 0.037579 |
| 4-Nitrophenol | C6 H5 N O3 | -1.25 | 0.037927 |
| LPC 22:5 | C30 H52 N O7 P | -2.12 | 0.038643 |
| Prolylleucine | C11 H20 N2 O3 | -1.50 | 0.042631 |
| (+/-)-Cannabichromeorcin | C17 H22 O2 | -0.68 | 0.043879 |
| Gly-Tyr-Ala | C14 H19 N3 O5 | -2.01 | 0.044822 |
| all-cis-4,7,10,13,16-Docosapentaenoic acid | C22 H34 O2 | -1.18 | 0.046915 |
| 3-Phosphoglyceric acid | C3 H7 O7 P | -2.45 | 0.047123 |
| Benzyl 6-O-beta-D-glucopyranosyl-beta-D-glucopyranoside | C19 H28 O11 | 1.75 | 0.047204 |
| 4-Methoxycinnamic Acid | C10 H10 O3 | -1.06 | 0.047298 |
| Phe-Pro | C14 H18 N2 O3 | -1.86 | 0.047945 |
| PE 16:1_18:2 | C39 H72 N O8 P | -0.71 | 0.048402 |
| 5-Methoxyindole-3-Carbaldehyde | C10 H9 N O2 | 1.19 | 0.04848 |
| (+/-)7(8)-DiHDPA | C22 H34 O4 | 1.10 | 0.04926 |
| 2'-O-Methyluridine | C10 H14 N2 O6 | 0.99 | 0.049557 |
